# Supplementary material
Source: PubMed Central journal article supplement (PMC2587018)
Supplement: NIHMS62578-supplement-1si20070531_11.pdf [file NIHMS62578-supplement-1si20070531_11.pdf]

# First Total Synthesis of Protoapigenone and its Analogs as Potent Cytotoxic Agents

*An-Shen Lin,<sup>†,‡</sup> Kyoko Nakagawa-Goto,<sup>‡</sup> Fang-Rong Chang,<sup>†</sup> Donglei Yu,<sup>‡</sup> Susan L. Morris-Natschke,<sup>‡</sup>*

*Chin-Chung Wu,<sup>†</sup> Shu-Li Chen,<sup>†</sup> Yang-Chang Wu,<sup>§,†,\*</sup> Kuo-Hsiung Lee<sup>‡,\*</sup>*

Graduate Institute of Natural Products, Kaohsiung Medical University, Kaoshiung 807, Taiwan, Natural Products Research Laboratories, School of Pharmacy, University of North Carolina, Chapel Hill, North Carolina 27599, National SunYat-Sen University-Kaohsiung Medical University Joint Research Center

## Supporting Information

### Contents:

High resolution mass spectral data for target compounds.

HPLC analysis of the target compounds.

## High resolution mass spectral data for target compounds

| Compound  | High resolution mass spectra |            |          |
|-----------|------------------------------|------------|----------|
|           | Chemical formula             | Calculated | Measured |
| <b>1</b>  | $C_{15}H_{10}O_6 + H$        | 287.0556   | 287.0556 |
| <b>14</b> | $C_{17}H_{14}O_7 + H$        | 331.0818   | 331.0812 |
| <b>15</b> | $C_{17}H_{14}O_6 + H$        | 315.0869   | 315.0858 |
| <b>16</b> | $C_{18}H_{16}O_6 + H$        | 329.1025   | 329.1011 |
| <b>20</b> | $C_{15}H_{10}O_4 + H$        | 255.0657   | 255.0650 |
| <b>21</b> | $C_{16}H_{12}O_4 + H$        | 269.0814   | 269.0811 |
| <b>22</b> | $C_{15}H_{10}O_5 + H$        | 271.0606   | 271.0590 |
| <b>23</b> | $C_{16}H_{12}O_5 + H$        | 285.0763   | 285.0758 |
| <b>24</b> | $C_{16}H_{12}O_6 + H$        | 301.0712   | 301.0712 |
| <b>26</b> | $C_{19}H_{12}O_4 + H$        | 305.0814   | 305.0806 |
| <b>27</b> | $C_{20}H_{14}O_4 + H$        | 319.0970   | 319.0967 |
| <b>29</b> | $C_{20}H_{14}O_4 + H$        | 319.0970   | 319.0974 |

## **HPLC analysis of the final compounds.**

Compound purities were determined by two diverse HPLC conditions.

### HPLC conditions No.1:

System: Shimadzu SLC 10A system controller,

Shimadzu LC-20A performance liquid chromatography

Detector: Shimadzu SPD-M10A at 254 nm

Column: Alltech 4.6 mm x 250 mm C-18

Solvents:

A: [MeCN/H<sub>2</sub>O 70/30] 90%

B: [H<sub>2</sub>O] 10%

Mode: Isocratic system

Flow rate: 1 mL / min

### HPLC conditions No.2:

System: Shimadzu SLC 10A system controller,

Shimadzu LC-20A performance liquid chromatography

Detector: Shimadzu SPD-M10A at 254 nm

Column: Alltech 4.6 mm x 250 mm C-18

Solvents:

A: [MeOH] 70%

B: [H<sub>2</sub>O] 30%

Mode: Isocratic system

Flow rate: 1 mL / min

## HPLC analysis of the final compounds

| Compound  | HPLC condition No.1  |                 | HPLC condition No.2  |                 |
|-----------|----------------------|-----------------|----------------------|-----------------|
|           | Retention time (min) | Purity (area %) | Retention time (min) | Purity (area %) |
| <b>1</b>  | 3.40                 | 100.0           | 5.00                 | 99.3            |
| <b>14</b> | 4.57                 | 99.2            | 8.82                 | 98.4            |
| <b>15</b> | 2.92                 | 98.2            | 4.83                 | 98.1            |
| <b>16</b> | 4.28                 | 98.7            | 6.21                 | 99.3            |
| <b>20</b> | 3.40                 | 98.9            | 4.69                 | 98.3            |
| <b>21</b> | 4.91                 | 98.8            | 5.97                 | 98.6            |
| <b>22</b> | 4.16                 | 98.5            | 6.48                 | 98.0            |
| <b>23</b> | 7.21                 | 100.0           | 9.45                 | 100.0           |
| <b>24</b> | 4.30                 | 99.4            | 7.73                 | 100.0           |
| <b>26</b> | 5.14                 | 99.5            | 9.97                 | 98.3            |
| <b>27</b> | 15.2                 | 98.4            | 15.21                | 98.4            |
| <b>29</b> | 8.26                 | 98.8            | 13.93                | 98.2            |
